# Supplementary material for: Similarity between the redox potentials of 3d transition-metal ions in polyanionic insertion materials and aqueous solutions
Source: Royal Society of Chemistry journal article supplement (doi:10.1039/d2cp00383j), 2022-01-01
Supplement: d2cp00383j1.pdf [file d2cp00383j1.pdf]

## Electronic Supplementary Information

### **Similarity between the Redox Potentials of 3*d* Transition-Metal Ions in Polyanionic Insertion Materials and Aqueous Solutions**

Kingo Ariyoshi\*

Table S1. Standard electrode potentials for 3d transition-metal ions.

| Redox                              | Electrode                                      | $E^\circ$ vs. SHE | Electrode Reaction                                                                                                       |
|------------------------------------|------------------------------------------------|-------------------|--------------------------------------------------------------------------------------------------------------------------|
| Ti <sup>4+</sup> /Ti <sup>3+</sup> | TiO <sup>2+</sup> /Ti <sup>3+</sup>            | +0.100            | TiO <sup>2+</sup> + 2H <sup>+</sup> + e <sup>-</sup> $\rightleftharpoons$ Ti <sup>3+</sup> + H <sub>2</sub> O            |
| V <sup>3+</sup> /V <sup>2+</sup>   | V <sup>3+</sup> /V <sup>2+</sup>               | -0.255            | V <sup>3+</sup> + e <sup>-</sup> $\rightleftharpoons$ V <sup>2+</sup>                                                    |
| V <sup>4+</sup> /V <sup>3+</sup>   | VO <sup>2+</sup> /V <sup>3+</sup>              | +0.337            | VO <sup>2+</sup> + 2H <sup>+</sup> + e <sup>-</sup> $\rightleftharpoons$ V <sup>3+</sup>                                 |
| V <sup>5+</sup> /V <sup>4+</sup>   | VO <sub>2</sub> <sup>+</sup> /VO <sup>2+</sup> | +0.958            | VO <sub>2</sub> <sup>+</sup> + 2H <sup>+</sup> + e <sup>-</sup> $\rightleftharpoons$ VO <sup>2+</sup> + H <sub>2</sub> O |
| Cr <sup>3+</sup> /Cr <sup>2+</sup> | Cr <sup>3+</sup> /Cr <sup>2+</sup>             | -0.424            | Cr <sup>3+</sup> + e <sup>-</sup> $\rightleftharpoons$ Cr <sup>2+</sup>                                                  |
| Mn <sup>3+</sup> /Mn <sup>2+</sup> | Mn <sup>3+</sup> /Mn <sup>2+</sup>             | +1.5              | Mn <sup>3+</sup> + e <sup>-</sup> $\rightleftharpoons$ Mn <sup>2+</sup>                                                  |
| Fe <sup>3+</sup> /Fe <sup>2+</sup> | Fe <sup>3+</sup> /Fe <sup>2+</sup>             | +0.771            | Fe <sup>3+</sup> + e <sup>-</sup> $\rightleftharpoons$ Fe <sup>2+</sup>                                                  |
| Co <sup>3+</sup> /Co <sup>2+</sup> | Co <sup>3+</sup> /Co <sup>2+</sup>             | +1.81             | Co <sup>3+</sup> + e <sup>-</sup> $\rightleftharpoons$ Co <sup>2+</sup>                                                  |
| Ni <sup>3+</sup> /Ni <sup>2+</sup> | Ni <sup>3+</sup> /Ni <sup>2+</sup>             | +2.5*             | Ni <sup>3+</sup> + e <sup>-</sup> $\rightleftharpoons$ Ni <sup>2+</sup>                                                  |

\* 2.26 V vs. saturated calomel electrode (SCE) (SCE: 0.241 V vs. standard hydrogen electrode)

Table S2. Hydration energies of 3d transition-metal ions calculated from Eq. (3).

| Ion              | $r / \text{\AA}$ | $G_{\text{hyd}}^*$<br>/ kJ mol <sup>-1</sup> | $G_{\text{hyd,calc}}^{**}$<br>/ kJ mol <sup>-1</sup> |
|------------------|------------------|----------------------------------------------|------------------------------------------------------|
| Ti <sup>3+</sup> | 0.67             |                                              | 4299                                                 |
| Ti <sup>4+</sup> | 0.605            |                                              | 7973                                                 |
| V <sup>3+</sup>  | 0.64             |                                              | 4383                                                 |
| V <sup>4+</sup>  | 0.58             |                                              | 8108                                                 |
| V <sup>5+</sup>  | 0.54             |                                              | 13021                                                |
| Mn <sup>2+</sup> | 0.83             | 1848                                         | 1734                                                 |
| Mn <sup>3+</sup> | 0.645            | 4520                                         | 4369                                                 |
| Fe <sup>2+</sup> | 0.78             | 1928                                         | 1786                                                 |
| Fe <sup>3+</sup> | 0.645            | 4383                                         | 4369                                                 |
| Co <sup>2+</sup> | 0.65             | 2003                                         | 1935                                                 |
| Co <sup>3+</sup> | 0.545            | 4622                                         | 4671                                                 |
| Ni <sup>2+</sup> | 0.69             | 2068                                         | 1887                                                 |
| Ni <sup>3+</sup> | 0.56             | 4813                                         | 4623                                                 |

\*The values obtained from Ref. 66

Table S3. Structural parameters of polyanionic materials.

|                                                                 | $Z$ | $a$ (Å) | $b$ (Å) | $c$ (Å) | $\beta$ (°) | Ref. |
|-----------------------------------------------------------------|-----|---------|---------|---------|-------------|------|
| LiMnPO <sub>4</sub>                                             | 4   | 10.45   | 6.10    | 4.75    |             | 53   |
| MnPO <sub>4</sub>                                               | 4   | 9.62    | 5.90    | 4.77    |             | 53   |
| LiFePO <sub>4</sub>                                             | 4   | 10.33   | 6.01    | 4.70    |             | 54   |
| FePO <sub>4</sub>                                               | 4   | 9.81    | 5.79    | 4.78    |             | 54   |
| LiCoPO <sub>4</sub>                                             | 4   | 10.20   | 5.92    | 4.70    |             | 55   |
| CoPO <sub>4</sub>                                               | 4   | 9.58    | 5.79    | 4.77    |             | 55   |
| LiNiPO <sub>4</sub>                                             | 4   | 10.03   | 5.85    | 4.67    |             | 56   |
| NiPO <sub>4</sub> *                                             | 4   |         |         |         |             | 57   |
| Li <sub>3</sub> Ti <sub>2</sub> (PO <sub>4</sub> ) <sub>3</sub> | 6   | 8.39    |         | 22.89   |             | 31   |
| LiTi <sub>2</sub> (PO <sub>4</sub> ) <sub>3</sub>               | 6   | 8.51    |         | 20.83   |             | 31   |
| Li <sub>3</sub> V <sub>2</sub> (PO <sub>4</sub> ) <sub>3</sub>  | 4   | 8.61    | 8.59    | 12.04   | 90.61       | 58   |
| LiV <sub>2</sub> (PO <sub>4</sub> ) <sub>3</sub>                | 4   | 8.30    | 8.52    | 11.70   | 89.60       | 58   |
| Li <sub>2</sub> V <sub>2</sub> (SO <sub>4</sub> ) <sub>3</sub>  | 4   | 13.06   | 8.65    | 8.72    | 115.4       | 59   |
| V <sub>2</sub> (SO <sub>4</sub> ) <sub>3</sub>                  | 4   | 8.29    | 8.51    | 11.63   | 90.6        | 60   |
| LiVOSO <sub>4</sub>                                             | 8   | 14.23   | 6.46    | 7.41    | 90.06       | 61   |
| VOSO <sub>4</sub>                                               | 4   | 7.37    | 6.30    | 7.08    |             | 62   |
| LiVOPO <sub>4</sub>                                             | 4   | 7.45    | 6.29    | 7.18    |             | 38   |
| VOPO <sub>4</sub>                                               | 4   | 7.79    | 6.14    | 6.97    |             | 38   |

\* Lattice volumes were estimated using density functional theory calculations.
